# Supplementary material
Source: Springer Nature journal article supplement (https://repositorio.tec.mx/bitstream/handle/11285/613679/12864_2006_958_MOESM4_ESM.pdf)
Supplement: MOESM4 [file 12864_2006_958_MOESM4_ESM.pdf]

Outside

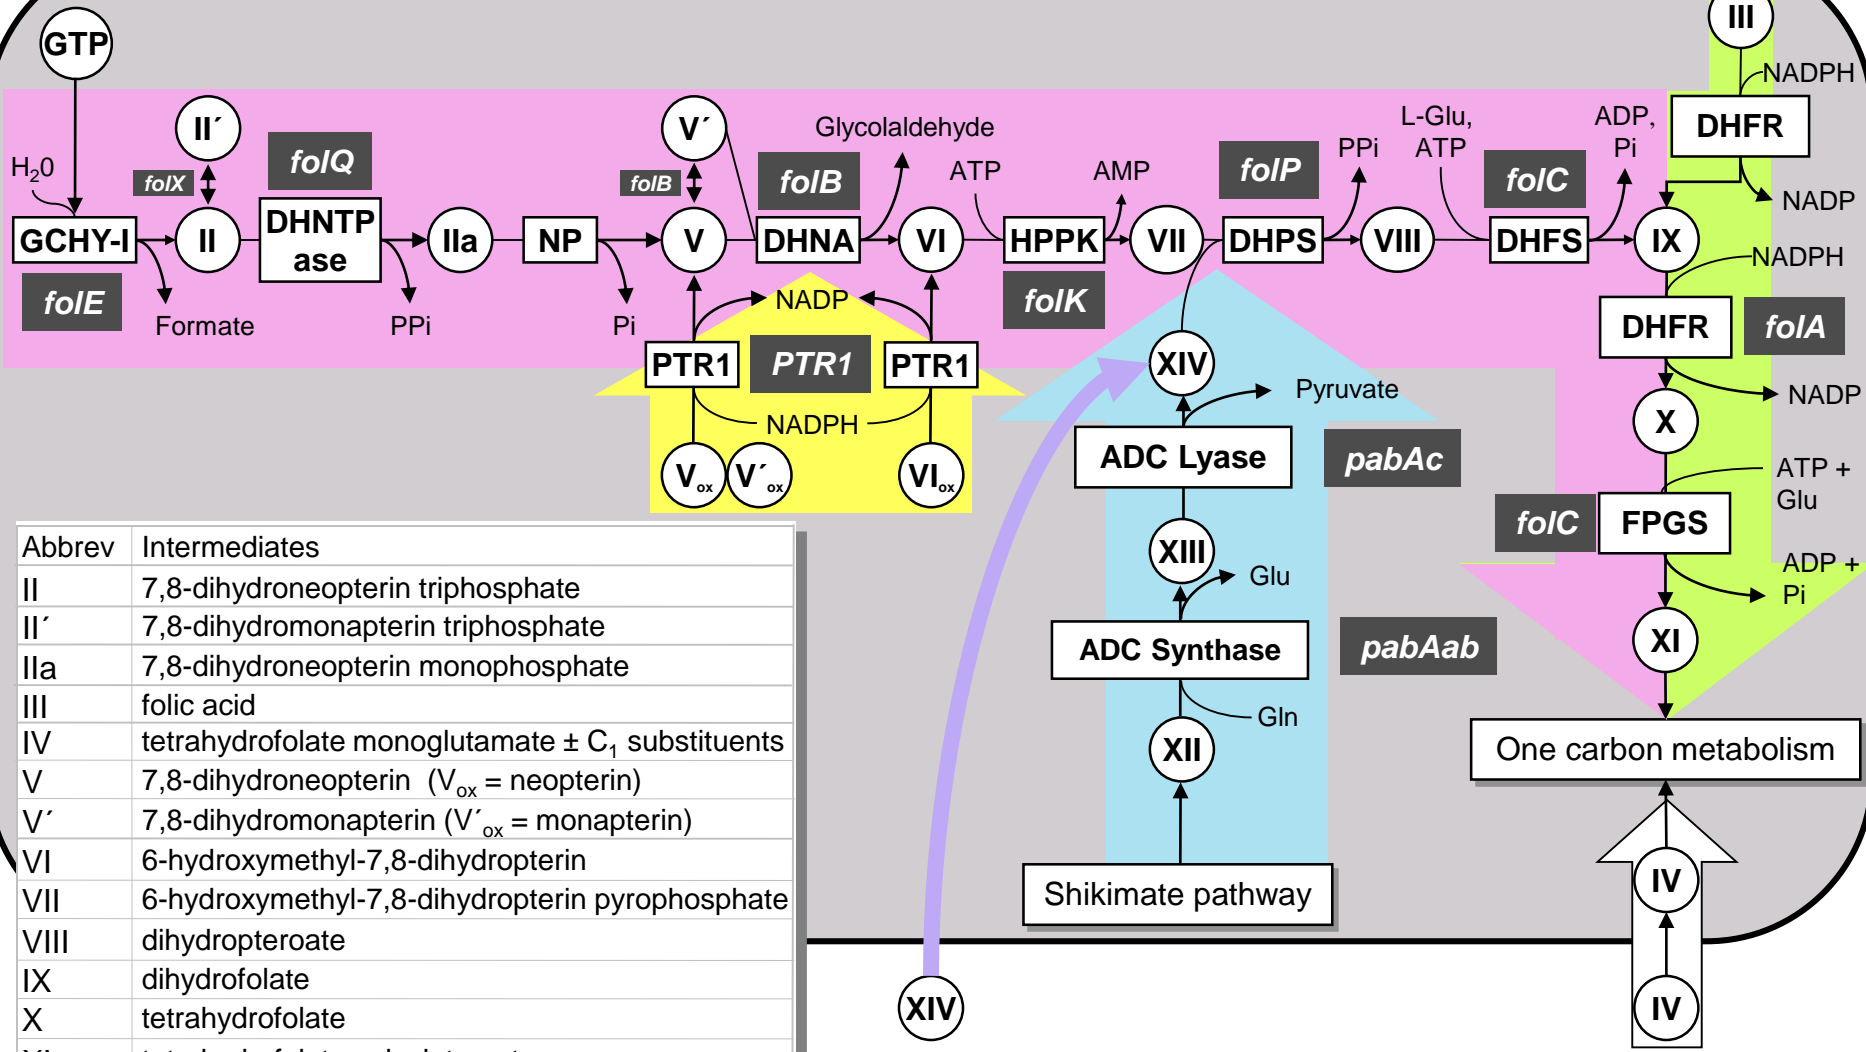

| Abbrev | Intermediates                                                |
|--------|--------------------------------------------------------------|
| II     | 7,8-dihydroneopterin triphosphate                            |
| II'    | 7,8-dihydroneopterin triphosphate                            |
| IIa    | 7,8-dihydroneopterin monophosphate                           |
| III    | folic acid                                                   |
| IV     | tetrahydrofolate monoglutamate ± C <sub>1</sub> substituents |
| V      | 7,8-dihydroneopterin (V <sub>ox</sub> = neopterin)           |
| V'     | 7,8-dihydroneopterin (V' <sub>ox</sub> = monapterin)         |
| VI     | 6-hydroxymethyl-7,8-dihydropterin                            |
| VII    | 6-hydroxymethyl-7,8-dihydropterin pyrophosphate              |
| VIII   | dihydropteroate                                              |
| IX     | dihydrofolate                                                |
| X      | tetrahydrofolate                                             |
| XI     | tetrahydrofolate polyglutamates                              |
| XII    | chorismate                                                   |
| XIII   | 4-amino-4-deoxychorismate                                    |
| XIV    | p-aminobenzoic acid                                          |

Pterin branch and de novo
pABA branch
Intact folate salvage

Pterin salvage
pABA salvage
THF-monoglutamate salvage
